# Supplementary material for: Energy Dissipation Rate and Micromixing in a Two-Step Micro-Reactor with Intensively Swirled Flows
Source: MDPI journal article supplement (doi:10.3390/mi13111859), 2022-10-29
Supplement: s1 [file s1]

## Supplementary Materials to the Paper

### Energy Dissipation Rate and Micromixing in a Two-Step

### Micro-Reactor with Intensively Swirled Flows

Rufat Sh. Abiev <sup>1,2,\*</sup> and Irina V. Makusheva <sup>1,2</sup>

<sup>1</sup> Ioffe Physical Technical Institute, Russian Academy of Sciences,  
194021 St. Petersburg, Russia

<sup>2</sup> Grebenshchikov Institute of Silicate Chemistry, Russian Academy of Sciences,  
199034 St. Petersburg, Russia

\* Correspondence: abiev.rufat@gmail.com

#### S1. Volumes of the MRISF-2

To measure the (micro)volumes of the microreactors, syringes without a needle with a volume of  $20 \pm 0.5$  mL and  $3 \pm 0.1$  mL were used (hereinafter referred to as a large and a small syringe, respectively).

A large syringe was filled with water to 20 mL, then it was attached to the branch pipe closest to the measured capillary vertically from below (for this, the apparatus was first rotated so that the fitting closest to the measured capillary was located vertically and with the hole down), after that, by pressing the piston, the water was squeezed out until it fills the test volume. The amount of water remaining in the syringe was recorded and then subtracted from the initial value (20 mL).

For a more accurate measurement of some channels and branch pipe, a small syringe was used, which has a more accurate division scale. To do this, the volume preceding these channels was first filled with water from a large syringe, then the outlet from the fitting was plugged for the time that the large syringe was replaced with a small one, already filled with 3 mL, after which the volume of the test capillary was measured.

For some volumes the direct measurements was not possible in this way. To measure them, the following approach was used: first, all the nearest capillaries were measured using the method described above. Then, after the water was completely poured out, the microreactor was again filled with water, so that not

only the zone whose volume was to be measured was filled, but also the nearest capillaries and branch pipes, the volume of which had already been measured in advance. The total volume of the measured area and already measured capillaries and fittings was recorded, after which the values of already known volumes were subtracted.

The total volume of the microreactor was measured similarly. To do this, the side fittings were first plugged, after which the volume was measured in the same way as described above. Results of measurements are shown in Fig. S1.

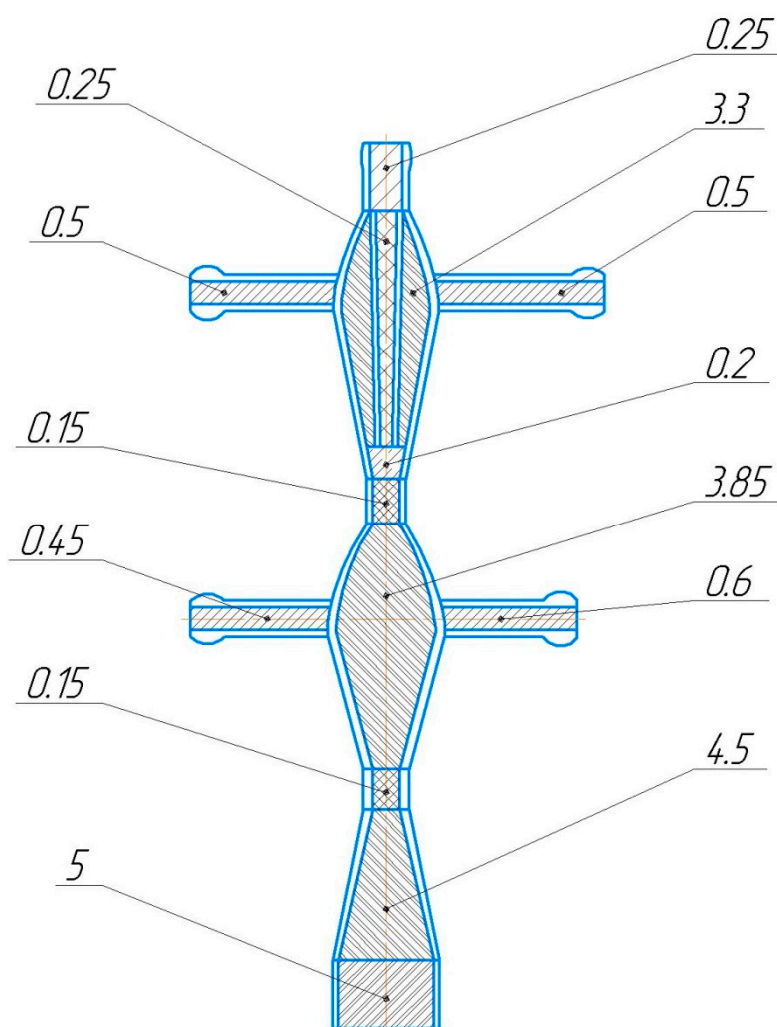

Figure. S1. Microvolumes of the two-stage microreactor MRISF-2  
(all data are in mL).

## S2. Raw results of measured flow rates and pressure drops in the MRISF-2

Table S1. Results of measurements for solutions supplied to the MRISF-2 through the upper tangential and axial branch pipes (TU1, Ax).

| no | Flow rate in the TU1 branch pipe, $Q_{1a}$ , L/min | Flow rate in the Ax branch pipe, $Q_{1b}$ , L/min | Total flow rate, $Q_2$ , L/min | Pressure in the TU1 branch pipe, $P_{1a}$ , kPa | Pressure in the Ax branch pipe, $P_{1b}$ , kPa |
|----|----------------------------------------------------|---------------------------------------------------|--------------------------------|-------------------------------------------------|------------------------------------------------|
| 1  | 1.03                                               | 0.98                                              | 2.01                           | 3.79                                            | 17.30                                          |
| 2  | 1.23                                               | 1.18                                              | 2.41                           | 6.03                                            | 28.22                                          |
| 3  | 1.45                                               | 1.43                                              | 2.88                           | 7.57                                            | 41.89                                          |
| 4  | 1.68                                               | 1.73                                              | 3.41                           | 9.99                                            | 61.25                                          |
| 5  | 1.97                                               | 2.03                                              | 4.00                           | 13.72                                           | 83.45                                          |
| 6  | 2.28                                               | 2.23                                              | 4.51                           | 19.73                                           | 99.54                                          |
| 7  | 2.52                                               | 2.45                                              | 4.97                           | 22.71                                           | 111.78                                         |
| 8  | 2.66                                               | 2.62                                              | 5.28                           | 25.57                                           | 140.00                                         |
| 9  | 2.86                                               | 2.83                                              | 5.69                           | 30.77                                           | 173.38                                         |
| 10 | 3.07                                               | 2.99                                              | 6.06                           | 35.88                                           | 186.47                                         |

Table S2. Results of calculations for solutions supplied to the MRISF-2 through the upper tangential and axial branch pipes (TU1, Ax).

| no | Parameters in inlets  |                      | Parameters in outlet  |               | Efficiency, $\eta$ , % | $\varepsilon$ , kW/kg |
|----|-----------------------|----------------------|-----------------------|---------------|------------------------|-----------------------|
|    | $E_{1a}$ , W<br>(TU1) | $E_{1b}$ , W<br>(Ax) | $E_2$ , W             | $N_{mix}$ , W |                        |                       |
| 1  | 0.108                 | 0.327                | $0.234 \cdot 10^{-3}$ | 0.435         | 99.94                  | 1.626                 |
| 2  | 0.184                 | 0.617                | $0.404 \cdot 10^{-3}$ | 0.800         | 99.95                  | 1.709                 |
| 3  | 0.268                 | 1.088                | $0.689 \cdot 10^{-3}$ | 1.356         | 99.95                  | 2.778                 |
| 4  | 0.397                 | 1.901                | $1.143 \cdot 10^{-3}$ | 2.298         | 99.95                  | 4.812                 |
| 5  | 0.622                 | 3.019                | $1.845 \cdot 10^{-3}$ | 3.639         | 99.95                  | 7.136                 |
| 6  | 0.997                 | 3.945                | $2.644 \cdot 10^{-3}$ | 4.939         | 99.95                  | 10.521                |
| 7  | 1.273                 | 4.874                | $3.539 \cdot 10^{-3}$ | 6.144         | 99.94                  | 11.894                |
| 8  | 1.502                 | 6.481                | $4.243 \cdot 10^{-3}$ | 7.979         | 99.95                  | 14.496                |
| 9  | 1.913                 | 8.627                | $5.311 \cdot 10^{-3}$ | 10.535        | 99.95                  | 21.433                |
| 10 | 2.377                 | 9.812                | $6.415 \cdot 10^{-3}$ | 12.182        | 99.95                  | 26.427                |

Table S3. Results of measurements for solutions supplied to the MRISF-2 through two upper tangential branch pipes (TU1, TU2).

| no | Flow rate in the TU1 branch pipe, $Q_{1a}$ , L/min | Flow rate in the TU2 branch pipe, $Q_{2a}$ , L/min | Total flow rate, $Q_2$ , L/min | Pressure in the TU1 branch pipe, $P_{1a}$ , kPa | Pressure in the TU2 branch pipe, $P_{2a}$ , kPa |
|----|----------------------------------------------------|----------------------------------------------------|--------------------------------|-------------------------------------------------|-------------------------------------------------|
| 1  | 1.024                                              | 1.027                                              | 2.051                          | 13.32                                           | 14.69                                           |
| 2  | 1.150                                              | 1.140                                              | 2.290                          | 12.09                                           | 13.49                                           |
| 3  | 1.280                                              | 1.320                                              | 2.600                          | 18.50                                           | 19.80                                           |
| 4  | 1.569                                              | 1.516                                              | 3.085                          | 27.90                                           | 29.68                                           |
| 5  | 1.800                                              | 1.795                                              | 3.595                          | 35.13                                           | 38.58                                           |
| 6  | 2.090                                              | 2.070                                              | 4.160                          | 45.28                                           | 49.11                                           |
| 7  | 2.200                                              | 2.160                                              | 4.360                          | 49.05                                           | 52.86                                           |
| 8  | 2.440                                              | 2.450                                              | 4.890                          | 51.49                                           | 57.92                                           |
| 9  | 2.810                                              | 2.781                                              | 5.591                          | 68.10                                           | 74.23                                           |
| 10 | 2.781                                              | 2.980                                              | 5.761                          | 84.70                                           | 88.04                                           |

Table S4. Results of calculations for solutions supplied to the MRISF-2 through two upper tangential branch pipes (TU1, TU2).

| no | Parameters in inlets  |                       | Parameters in outlet  |               | Efficiency, $\eta$ , % | $\varepsilon$ , kW/kg |
|----|-----------------------|-----------------------|-----------------------|---------------|------------------------|-----------------------|
|    | $E_{1a}$ , W<br>(TU1) | $E_{1b}$ , W<br>(TU2) | $E_2$ , W             | $N_{mix}$ , W |                        |                       |
| 1  | 0.271                 | 0.296                 | $0.249 \cdot 10^{-3}$ | 0.567         | 99.96                  | 0.567                 |
| 2  | 0.286                 | 0.310                 | $0.346 \cdot 10^{-3}$ | 0.596         | 99.95                  | 0.596                 |
| 3  | 0.462                 | 0.507                 | $0.507 \cdot 10^{-3}$ | 0.969         | 99.96                  | 0.969                 |
| 4  | 0.833                 | 0.846                 | $0.846 \cdot 10^{-3}$ | 1.678         | 99.95                  | 1.678                 |
| 5  | 1.195                 | 1.294                 | $1.339 \cdot 10^{-3}$ | 2.488         | 99.96                  | 2.488                 |
| 6  | 1.779                 | 1.891                 | $2.075 \cdot 10^{-3}$ | 3.668         | 99.94                  | 3.668                 |
| 7  | 2.027                 | 2.121                 | $2.389 \cdot 10^{-3}$ | 4.146         | 99.94                  | 4.146                 |
| 8  | 2.391                 | 2.665                 | $3.371 \cdot 10^{-3}$ | 5.053         | 99.93                  | 5.053                 |
| 9  | 3.619                 | 3.859                 | $5.038 \cdot 10^{-3}$ | 7.473         | 99.93                  | 7.473                 |
| 10 | 4.344                 | 4.876                 | $5.512 \cdot 10^{-3}$ | 9.214         | 99.94                  | 9.214                 |

Table S5. Results of measurements for solutions supplied to the MRISF-2 through the upper tangential and lower tangential branch pipes (TU1, TL2).

| no | Flow rate in the TU1 branch pipe, $Q_{1a}$ , L/min | Flow rate in the TL2 branch pipe, $Q_{1b}$ , L/min | Total flow rate, $Q_2$ , L/min | Pressure in the TU1 branch pipe, $P_{1a}$ , kPa | Pressure in the TL2 branch pipe, $P_{1b}$ , kPa |
|----|----------------------------------------------------|----------------------------------------------------|--------------------------------|-------------------------------------------------|-------------------------------------------------|
| 1  | 0.625                                              | 0.645                                              | 1.270                          | 0.829                                           | 1.164                                           |
| 2  | 0.789                                              | 0.792                                              | 1.581                          | 1.546                                           | 2.176                                           |
| 3  | 0.932                                              | 0.925                                              | 1.857                          | 2.208                                           | 3.515                                           |
| 4  | 1.054                                              | 1.037                                              | 2.091                          | 2.805                                           | 4.823                                           |
| 5  | 1.235                                              | 1.195                                              | 2.430                          | 3.877                                           | 6.582                                           |
| 6  | 1.473                                              | 1.540                                              | 3.013                          | 5.606                                           | 11.510                                          |
| 7  | 1.480                                              | 1.541                                              | 3.021                          | 5.696                                           | 11.678                                          |
| 8  | 1.729                                              | 1.655                                              | 3.384                          | 7.295                                           | 13.279                                          |
| 9  | 2.005                                              | 1.999                                              | 4.004                          | 9.426                                           | 19.112                                          |
| 10 | 2.230                                              | 2.190                                              | 4.420                          | 11.640                                          | 23.500                                          |
| 11 | 2.420                                              | 2.390                                              | 4.810                          | 13.773                                          | 26.810                                          |
| 12 | 2.830                                              | 2.770                                              | 5.600                          | 18.880                                          | 37.800                                          |
| 13 | 3.065                                              | 2.990                                              | 6.055                          | 22.570                                          | 47.260                                          |
| 14 | 3.060                                              | 3.090                                              | 6.150                          | 23.710                                          | 50.570                                          |

Table S6. Results of calculations for solutions supplied to the MRISF-2 through the upper tangential and lower tangential branch pipes (TU1, TL2).

| no | Parameters in inlets  |                       | Parameters in outlet  |               | Efficiency, $\eta$ , % | $\epsilon$ , kW/kg |
|----|-----------------------|-----------------------|-----------------------|---------------|------------------------|--------------------|
|    | $E_{1a}$ , W<br>(TU1) | $E_{1b}$ , W<br>(TL2) | $E_2$ , W             | $N_{mix}$ , W |                        |                    |
| 1  | 0.028                 | 0.025                 | $0.059 \cdot 10^{-3}$ | 0.053         | 99.89                  | 0.1507             |
| 2  | 0.048                 | 0.047                 | $0.114 \cdot 10^{-3}$ | 0.094         | 99.89                  | 0.2693             |
| 3  | 0.070                 | 0.079                 | $0.185 \cdot 10^{-3}$ | 0.148         | 99.89                  | 0.4252             |
| 4  | 0.094                 | 0.115                 | $0.264 \cdot 10^{-3}$ | 0.208         | 99.87                  | 0.5958             |
| 5  | 0.141                 | 0.174                 | $0.414 \cdot 10^{-3}$ | 0.313         | 99.87                  | 0.8983             |
| 6  | 0.225                 | 0.374                 | $0.789 \cdot 10^{-3}$ | 0.597         | 99.87                  | 1.713              |
| 7  | 0.229                 | 0.379                 | $0.795 \cdot 10^{-3}$ | 0.606         | 99.87                  | 1.737              |
| 8  | 0.336                 | 0.461                 | $1.117 \cdot 10^{-3}$ | 0.794         | 99.86                  | 2.278              |
| 9  | 0.494                 | 0.791                 | $1.851 \cdot 10^{-3}$ | 1.281         | 99.86                  | 3.676              |
| 10 | 0.666                 | 1.055                 | $2.489 \cdot 10^{-3}$ | 1.716         | 99.86                  | 4.923              |
| 11 | 0.843                 | 1.318                 | $3.208 \cdot 10^{-3}$ | 2.156         | 99.85                  | 6.184              |
| 12 | 1.325                 | 2.123                 | $5.063 \cdot 10^{-3}$ | 3.439         | 99.85                  | 9.866              |
| 13 | 1.691                 | 2.823                 | $6.400 \cdot 10^{-3}$ | 4.505         | 99.86                  | 12.920             |
| 14 | 1.745                 | 3.117                 | $6.706 \cdot 10^{-3}$ | 4.854         | 99.86                  | 13.920             |
